# Supplementary material for: Laparoscopic cholecystectomy versus percutaneous catheter drainage for acute cholecystitis in high risk patients (CHOCOLATE): multicentre randomised clinical trial
Source: PubMed Central journal article supplement — BMJ. 2018 Oct 8;363:k3965. doi: 10.1136/bmj.k3965 (PMC6174331; doi:10.1136/bmj.k3965), 2018-10-08
Supplement: looc043462.ww1.pdf [file looc043462.ww1.pdf]

## Supplementary Appendix

| <b>Table of contents</b>                                                         | <b>Page</b> |
|----------------------------------------------------------------------------------|-------------|
| Methods                                                                          |             |
| Postoperative antibiotics                                                        | 2           |
| Costs                                                                            | 2           |
| Results                                                                          |             |
| Eligible patients                                                                | 2           |
| Details on laparoscopic cholecystectomies                                        | 2           |
| Details on percutaneous catheter drainage                                        | 2           |
| Tables                                                                           |             |
| Table 1. Total direct medical costs                                              | 3           |
| Table 2. Baseline characteristics of included and non-included eligible patients | 4           |
| References                                                                       | 5           |

## METHODS

### *Postoperative antibiotics*

Antibiotic therapy was not routinely continued postoperatively unless the performing surgeon had indications to do so (e.g. sepsis, hemodynamic instability). In these cases, the primary investigator was notified and the indications well documented.

### *Costs*

To determine economic differences between laparoscopic cholecystectomy and percutaneous catheter drainage, the direct medical cholecystitis-related costs during a follow-up period of one year after randomization were taken into account. Primary data were used to assess the use of health care resources. For each patient, the following health care resources were assessed: the number of days of admission (on the general ward and intensive care unit), radiography, surgical procedures, endoscopic procedures, and the use of other medical services (outpatient clinic visits, telephonic consultations and emergency room visits). No volumes of hematological, biochemical or microbiological blood tests were taken into account as no differences were expected based on their low unit costs.

Unit costs for admission days, outpatient visits and emergency room visits were based on the 2015 Dutch manual for costing in health care research.<sup>1</sup> Unit costs of radiologic and endoscopic procedures were derived from the St. Antonius Hospital tariffs ledger (2016), which included personnel, material and overhead costs. Unit costs for cholecystectomy were calculated from specialists' fees for surgeon and anesthesiologist, personnel costs, purchase prices of materials used and overhead costs.<sup>2</sup> Unit costs are presented in eTable 1.

Costs were calculated as the product sum of the volumes of resources used and their respective unit costs.

## RESULTS

### *Eligible Patients*

During the study period, 246 patients were eligible but did not participate in the trial (figure 1). The baseline characteristics of these patients were comparable to the characteristics of the included patient, except for APACHE-II score (9.0 versus 9.4,  $p=0.01$ ) (eTable 2).

### *Details on laparoscopic cholecystectomies*

Fifty-five of the 64 patients (86%) received antibiotic prophylaxis before surgery, six patients (9%) did not receive antibiotics prophylaxis and in three patients (5%) it was unclear whether they received preoperative antibiotics. The mean duration of the procedure was  $81.5 \pm 29.0$  minutes. The reason for conversion included difficulty in identifying the anatomy either due to extensive inflammation or poor vision in all patients, in addition to fibrosis of Calot's triangle in two patients, a perforated cystic duct in one patient and a ruptured gallbladder in one patient.

### *Details on percutaneous catheter drainage*

Percutaneous catheter drainage was performed with image guidance using ultrasound in 62 patients (91%), computed tomography in 2 patients (3%) and X-per guide in 4 patients (6%). The transperitoneal route was used in 57 patients (84%), the transhepatic route in eight patients (12%), and in three patients (4%) the route of gallbladder puncture was unclear. The median drain size was 8.5 French (IQR 8.5 to 8.5). The mean duration of the procedure was  $20.9 \pm 7.6$  minutes. The median difficulty of the procedure as scored by the radiologist was 3 (IQR 2 to 6) (as scored by VAS 1 to 10). The drain was removed after a mean period of  $20.9 \pm 7.6$  days.

| <b>Table 1. Total Direct Medical Costs *</b> |                                    |                  |                  |                  |                  |
|----------------------------------------------|------------------------------------|------------------|------------------|------------------|------------------|
|                                              |                                    | <b>LC (n=66)</b> |                  | <b>PD (n=68)</b> |                  |
|                                              | <b>Price per unit <sup>b</sup></b> | <b>N</b>         | <b>Total (€)</b> | <b>N</b>         | <b>Total (€)</b> |
| <b>Hospital stay <sup>1</sup></b>            |                                    |                  |                  |                  |                  |
| General ward (per day)                       | 476                                | 417              | 198,492          | 833              | 396,508          |
| Intensive care unit (per day) †              | 1186                               | 47               | 55,742           | 2                | 2372             |
| <b>Radiology §</b>                           |                                    |                  |                  |                  |                  |
| Abdominal ultrasound                         | 76                                 | 15               | 1140             | 55               | 4180             |
| CT scan                                      | 216                                | 11               | 2376             | 35               | 7560             |
| Cranial CT scan                              | 198                                | 2                | 396              | 1                | 198              |
| MRI scan                                     | 279                                | 6                | 1674             | 2                | 558              |
| X-ray thorax                                 | 52                                 | 41               | 2132             | 33               | 1716             |
| X-ray abdomen                                | 52                                 | 1                | 52               | 9                | 468              |
| US or CT guided drainage                     | 437                                | 9                | 3933             | 85               | 37,145           |
| Paracentesis                                 | 168                                | 0                | 0                | 1                | 168              |
| Thoracentesis                                | 101                                | 0                | 0                | 2                | 202              |
| Antegrade cholangiography                    | 401                                | 3                | 1203             | 68               | 27,268           |
| <b>Endoscopy §</b>                           |                                    |                  |                  |                  |                  |
| ERCP                                         | 876                                | 8                | 7008             | 12               | 10,512           |
| Gastroscopy or duodenoscopy                  | 405                                | 1                | 405              | 3                | 1215             |
| Enteral feeding tube placement               | 459                                | 1                | 459              | 3                | 1377             |
| Endoscopic ultrasound                        | 125                                | 0                | 0                | 1                | 125              |
| <b>Surgery <sup>2</sup></b>                  |                                    |                  |                  |                  |                  |
| Cholecystectomy                              | 1256                               | 66               | 82,896           | 31               | 38,936           |
| Diagnostic laparoscopy                       | 1114                               | 1                | 1114             | 1                | 1114             |
| <b>Other <sup>1</sup></b>                    |                                    |                  |                  |                  |                  |
| Outpatient visits                            | 91                                 | 71               | 6461             | 185              | 16,835           |
| Tel. outpatient consultation                 | 15                                 | 13               | 195              | 21               | 315              |
| Emergency room visits                        | 259                                | 7                | 1813             | 56               | 14,504           |
| <b>Total</b>                                 |                                    |                  | <b>367,491</b>   |                  | <b>563,276</b>   |
| <b>Health care costs per patient *</b>       |                                    |                  | <b>€ 5568</b>    |                  | <b>€ 8283</b>    |

LC=laparoscopic cholecystectomy, PD= percutaneous drainage, CT=computed tomography, MRI=magnetic resonance imaging, US=ultrasound, ERCP=endoscopic retrograde cholangiopancreatography.

\* For conversion to US dollars multiply by 1.10

† Exclusive diagnostic tests, procedures, radiography and medication

§ Unit costs based on the St. Antonius hospital ledger (2016)

| <b>Table 2. Baseline Characteristics of the Included and Non-included Eligible Patients *</b> |                                      |                                          |
|-----------------------------------------------------------------------------------------------|--------------------------------------|------------------------------------------|
| <b>Characteristics</b>                                                                        | <b>Included patients<br/>(n=134)</b> | <b>Non-included patients<br/>(n=246)</b> |
| Age, years, Mean (SD)                                                                         | 73.2 (9.7)                           | 73.2 (10.8)                              |
| Male sex, No. (%)                                                                             | 85 (63%)                             | 134 (55%)                                |
| Coexisting conditions, No. (%)                                                                |                                      |                                          |
| Cardiovascular disease                                                                        | 91 (68%)                             | 154 (63%)                                |
| Pulmonary disease                                                                             | 27 (20%)                             | 38 (15%)                                 |
| Chronic renal insufficiency                                                                   | 8 (6%)                               | 12 (5%)                                  |
| Diabetes                                                                                      | 29 (22%)                             | 50 (20%)                                 |
| Previous abdominal surgery, No. (%)                                                           | 26 (19%)                             | 40 (16%)                                 |
| ASA classification on admission, No. (%)                                                      |                                      |                                          |
| I: Healthy status                                                                             | 14 (10%)                             | 40 (16%)                                 |
| II: Mild systemic disease                                                                     | 70 (52%)                             | 121 (49%)                                |
| III: Severe systematic disease                                                                | 47 (35%)                             | 82 (33%)                                 |
| IV: Severe systemic disease that is a constant threat to life                                 | 3 (2%)                               | 3 (1%)                                   |
| Disease severity                                                                              |                                      |                                          |
| APACHE-II score, Mean (SD) †                                                                  | 9.4 (2.0)                            | 9.0 (1.8)                                |

ASA=American Society of Anesthesiologists, APACHE=Acute Physiology and Chronic Health Evaluation.

\* The baseline characteristics were similar in the two groups, with the exception of the APACHE-II score, which was higher in the included group.

† Scores on the Acute Physiologic and Chronic Health Evaluation II (APACHE II) scale range from 0 to 71, with higher scores indicating more severe disease.

## REFERENCES

1. Hakkaart-van Roijen L, Van der Linden N, Bouwmans C, Kanters T, Tan S. Kostenhandleiding: Methodologie van kostenonderzoek en referentieprijzen voor economische evaluaties in de gezondheidszorg (geactualiseerde versie 2015). Opdracht van Zorginstituut Nederland 2015. URL: <https://www.zorginstituutnederland.nl/publicaties/publicatie/2016/02/29/richtlijn-voor-het-uitvoeren-vaneconomische-evaluaties-in-de-gezondheidszorg> (accessed October 18, 2017)
2. Da Costa DW, Dijkman LM, Bouwense SA, et al. Cost-effectiveness of same-admission versus interval cholecystectomy after mild gallstone pancreatitis in the PONCHO trial. *Br J Surg* 2016; 103: 1695-1703.
